# Supplementary material for: Migration of Chadic speaking pastoralists within Africa based on population structure of Chad Basin and phylogeography of mitochondrial L3f haplogroup
Source: BMC Evol Biol. 2009 Mar 23;9:63. doi: 10.1186/1471-2148-9-63 (PMC2680838; doi:10.1186/1471-2148-9-63)
Supplement: Additional file 4 — Matrix of FST between populations. Matrix of FST values derived from mtDNA HVS I sequences in African populations speaking Afro-Asiatic languages and the non-Afro-Asiatic speaking populations of Chad Basin; FST values below diagonal and significant values (p < 0.001) above diagonal. [file 1471-2148-9-63-S4.pdf]

Matrix of FSTs between populations and their significance levels (p = 0,001)

|                   | Egyptians Lower | Egyptians Upper 1 | Egyptians Upper 2 | al-Hayez | Amhara 1 | Amhara 2 | Gurage | Saharawi | Maroccan Arab | Zriba | Arabs Chad | Arabs Shuwa | Tigrais | Oromo | Afars | Burunge | Iraqw | Somali | Hide | Kotoko | Mafa | Masa | Buduma | Hausa | Daba | Mandara | Ouldeme | Podokwo | Tuareg | Maroccan Berber | Berber Souss | Kesra | Fali2 | Fulani Bongor | Fulani Tcheboua | Fulani1 | Fali1 | Fulani2 | Tupuri | Yoruba | Kanembu | Kanuri | Kanuri W | Songhai |      |   |
|-------------------|-----------------|-------------------|-------------------|----------|----------|----------|--------|----------|---------------|-------|------------|-------------|---------|-------|-------|---------|-------|--------|------|--------|------|------|--------|-------|------|---------|---------|---------|--------|-----------------|--------------|-------|-------|---------------|-----------------|---------|-------|---------|--------|--------|---------|--------|----------|---------|------|---|
| Egyptians Lower   |                 | -                 | -                 | -        | +        | +        | -      | +        | -             | +     | -          | +           | -       | -     | -     | +       | +     | +      | +    | +      | +    | +    | +      | +     | +    | +       | +       | +       | +      | +               | +            | +     | +     | +             | +               | +       | +     | +       | +      | +      | +       | +      | +        | +       | +    |   |
| Egyptians Upper 1 | 0,00            |                   | -                 | -        | -        | -        | -      | -        | -             | -     | -          | -           | -       | -     | -     | -       | -     | -      | -    | -      | -    | -    | -      | -     | -    | -       | -       | -       | -      | -               | -            | -     | -     | -             | -               | -       | -     | -       | -      | -      | -       | -      | -        | -       | -    |   |
| Egyptians Upper 2 | 0,02            | 0,02              |                   | -        | -        | -        | -      | +        | -             | +     | -          | +           | -       | -     | -     | +       | +     | +      | +    | +      | +    | +    | +      | +     | +    | +       | +       | +       | +      | +               | +            | +     | +     | +             | +               | +       | +     | +       | +      | +      | +       | +      | +        | +       | +    |   |
| al-Hayez          | 0,03            | 0,04              | 0,05              |          | +        | -        | -      | -        | -             | +     | -          | +           | -       | -     | -     | +       | +     | +      | +    | +      | +    | +    | +      | +     | +    | +       | +       | +       | +      | +               | +            | +     | +     | +             | +               | +       | +     | +       | +      | +      | +       | +      | +        | +       | +    |   |
| Amhara 1          | 0,02            | 0,03              | 0,02              | 0,05     |          | -        | -      | +        | -             | +     | -          | +           | -       | -     | -     | +       | +     | +      | +    | +      | +    | +    | +      | +     | +    | +       | +       | +       | +      | +               | +            | +     | +     | +             | +               | +       | +     | +       | +      | +      | +       | +      | +        | +       | +    |   |
| Amhara 2          | 0,03            | 0,04              | 0,01              | 0,05     | 0,01     |          | -      | -        | +             | -     | -          | -           | -       | -     | -     | +       | +     | +      | +    | +      | +    | +    | +      | +     | +    | +       | +       | +       | +      | +               | +            | +     | +     | +             | +               | +       | +     | +       | +      | +      | +       | +      | +        | +       | +    |   |
| Gurage            | 0,04            | 0,04              | 0,02              | 0,07     | 0,00     | 0,00     |        | +        | -             | +     | -          | -           | -       | -     | -     | +       | +     | +      | +    | +      | +    | +    | +      | +     | +    | +       | +       | +       | +      | +               | +            | +     | +     | +             | +               | +       | +     | +       | +      | +      | +       | +      | +        | +       | +    |   |
| Saharawi          | 0,05            | 0,04              | 0,06              | 0,14     | 0,09     | 0,11     | 0,13   |          | -             | -     | +          | +           | +       | -     | -     | +       | +     | +      | +    | +      | +    | +    | +      | +     | +    | +       | +       | +       | +      | +               | +            | +     | +     | +             | +               | +       | +     | +       | +      | +      | +       | +      | +        | +       | +    |   |
| Maroccan Arab     | 0,01            | 0,00              | 0,03              | 0,06     | 0,04     | 0,05     | 0,04   | 0,03     |               | +     | +          | +           | +       | +     | +     | +       | +     | +      | +    | +      | +    | +    | +      | +     | +    | +       | +       | +       | +      | +               | +            | +     | +     | +             | +               | +       | +     | +       | +      | +      | +       | +      | +        | +       | +    |   |
| Zriba             | 0,05            | 0,05              | 0,08              | 0,15     | 0,10     | 0,11     | 0,15   | 0,03     | 0,05          |       | +          | +           | +       | +     | +     | +       | +     | +      | +    | +      | +    | +    | +      | +     | +    | +       | +       | +       | +      | +               | +            | +     | +     | +             | +               | +       | +     | +       | +      | +      | +       | +      | +        | +       | +    |   |
| Arabs Chad        | 0,03            | 0,04              | 0,03              | 0,02     | 0,02     | 0,01     | 0,03   | 0,17     | 0,08          | 0,16  |            | -           | -       | -     | -     | -       | -     | -      | -    | -      | -    | -    | -      | -     | -    | -       | -       | -       | -      | -               | -            | -     | -     | -             | -               | -       | -     | -       | -      | -      | -       | -      | -        | -       |      |   |
| Arabs Shuwa       | 0,07            | 0,08              | 0,05              | 0,09     | 0,04     | 0,02     | 0,04   | 0,20     | 0,10          | 0,20  | 0,01       |             | +       | -     | -     | +       | +     | +      | +    | +      | +    | +    | +      | +     | +    | +       | +       | +       | +      | +               | +            | +     | +     | +             | +               | +       | +     | +       | +      | +      | +       | +      | +        | +       | +    | + |
| Tigrais           | 0,01            | 0,02              | 0,01              | 0,06     | 0,00     | 0,00     | 0,00   | 0,08     | 0,04          | 0,09  | 0,03       | 0,05        |         | -     | -     | +       | +     | +      | +    | +      | +    | +    | +      | +     | +    | +       | +       | +       | +      | +               | +            | +     | +     | +             | +               | +       | +     | +       | +      | +      | +       | +      | +        | +       | +    |   |
| Oromo             | 0,03            | 0,03              | 0,01              | 0,05     | 0,00     | 0,00     | 0,00   | 0,11     | 0,05          | 0,13  | 0,01       | 0,03        | 0,00    |       | -     | -       | +     | +      | +    | +      | +    | +    | +      | +     | +    | +       | +       | +       | +      | +               | +            | +     | +     | +             | +               | +       | +     | +       | +      | +      | +       | +      | +        | +       | +    |   |
| Afars             | 0,04            | 0,05              | 0,03              | 0,06     | 0,00     | 0,00     | 0,00   | 0,18     | 0,07          | 0,22  | 0,00       | 0,03        | 0,01    | 0,00  |       | -       | -     | -      | -    | -      | -    | -    | -      | -     | -    | -       | -       | -       | -      | -               | -            | -     | -     | -             | -               | -       | -     | -       | -      | -      | -       | -      | -        | -       |      |   |
| Burunge           | 0,25            | 0,26              | 0,17              | 0,22     | 0,15     | 0,14     | 0,14   | 0,38     | 0,25          | 0,45  | 0,18       | 0,21        | 0,18    | 0,14  | 0,11  |         | -     | -      | +    | +      | +    | +    | +      | +     | +    | +       | +       | +       | +      | +               | +            | +     | +     | +             | +               | +       | +     | +       | +      | +      | +       | +      | +        | +       | +    |   |
| Iraqw             | 0,29            | 0,31              | 0,19              | 0,24     | 0,17     | 0,16     | 0,17   | 0,53     | 0,34          | 0,66  | 0,23       | 0,31        | 0,20    | 0,16  | 0,14  | 0,02    |       | +      | +    | +      | +    | +    | +      | +     | +    | +       | +       | +       | +      | +               | +            | +     | +     | +             | +               | +       | +     | +       | +      | +      | +       | +      | +        | +       | +    |   |
| Somali            | 0,04            | 0,04              | 0,03              | 0,07     | 0,01     | 0,00     | 0,00   | 0,16     | 0,06          | 0,16  | 0,02       | 0,01        | 0,01    | 0,01  | 0,01  | 0,17    | 0,23  |        | +    | +      | +    | +    | +      | +     | +    | +       | +       | +       | +      | +               | +            | +     | +     | +             | +               | +       | +     | +       | +      | +      | +       | +      | +        | +       | +    |   |
| Hide              | 0,06            | 0,08              | 0,05              | 0,06     | 0,03     | 0,02     | 0,02   | 0,20     | 0,09          | 0,22  | 0,00       | 0,01        | 0,05    | 0,03  | 0,00  | 0,15    | 0,18  | 0,01   |      | -      | -    | -    | -      | -     | -    | -       | -       | -       | -      | -               | -            | -     | -     | -             | -               | -       | -     | -       | -      | -      | -       | -      | -        | -       |      |   |
| Kotoko            | 0,10            | 0,11              | 0,06              | 0,12     | 0,05     | 0,04     | 0,05   | 0,20     | 0,12          | 0,21  | 0,05       | 0,03        | 0,07    | 0,05  | 0,04  | 0,19    | 0,24  | 0,03   | 0,01 |        | -    | -    | -      | -     | -    | -       | -       | -       | -      | -               | -            | -     | -     | -             | -               | -       | -     | -       | -      | -      | -       | -      | -        | -       |      |   |
| Mafa              | 0,10            | 0,11              | 0,06              | 0,11     | 0,05     | 0,04     | 0,05   | 0,21     | 0,12          | 0,24  | 0,04       | 0,02        | 0,07    | 0,05  | 0,04  | 0,16    | 0,22  | 0,04   | 0,01 | 0,03   |      | -    | -      | -     | -    | -       | -       | -       | -      | -               | -            | -     | -     | -             | -               | -       | -     | -       | -      | -      | -       | -      | -        | -       |      |   |
| Masa              | 0,10            | 0,12              | 0,07              | 0,10     | 0,04     | 0,03     | 0,03   | 0,25     | 0,13          | 0,26  | 0,02       | 0,02        | 0,06    | 0,03  | 0,02  | 0,16    | 0,21  | 0,02   | 0,00 | 0,00   | 0,02 |      | -      | -     | -    | -       | -       | -       | -      | -               | -            | -     | -     | -             | -               | -       | -     | -       | -      | -      | -       | -      | -        | -       |      |   |
| Buduma            | 0,08            | 0,09              | 0,07              | 0,10     | 0,05     | 0,04     | 0,04   | 0,21     | 0,11          | 0,20  | 0,03       | 0,03        | 0,06    | 0,04  | 0,04  | 0,22    | 0,29  | 0,02   | 0,00 | 0,03   | 0,04 | 0,03 |        | -     | -    | -       | -       | -       | -      | -               | -            | -     | -     | -             | -               | -       | -     | -       | -      | -      | -       | -      | -        | -       |      |   |
| Hausa             | 0,10            | 0,12              | 0,10              | 0,09     | 0,05     | 0,04     | 0,05   | 0,31     | 0,14          | 0,28  | 0,02       | 0,03        | 0,08    | 0,05  | 0,02  | 0,22    | 0,34  | 0,03   | 0,00 | 0,06   | 0,06 | 0,03 | 0,02   |       | -    | -       | -       | -       | -      | -               | -            | -     | -     | -             | -               | -       | -     | -       | -      | -      | -       | -      | -        | -       |      |   |
| Daba              | 0,10            | 0,10              | 0,06              | 0,06     | 0,03     | 0,03     | 0,03   | 0,26     | 0,12          | 0,28  | 0,00       | 0,01        | 0,07    | 0,03  | 0,01  | 0,13    | 0,17  | 0,02   | 0,00 | 0,04   | 0,03 | 0,00 | 0,03   | 0,00  |      | -       | -       | -       | -      | -               | -            | -     | -     | -             | -               | -       | -     | -       | -      | -      | -       | -      | -        | -       |      |   |
| Mandara           | 0,10            | 0,12              | 0,09              | 0,08     | 0,04     | 0,05     | 0,04   | 0,27     | 0,12          | 0,27  | 0,03       | 0,04        | 0,08    | 0,05  | 0,01  | 0,19    | 0,26  | 0,03   | 0,00 | 0,06   | 0,06 | 0,02 | 0,03   | 0,00  | 0,15 | 0,18    | 0,01    | -       | -      | -               | -            | -     | -     | -             | -               | -       | -     | -       | -      | -      | -       | -      | -        | -       |      |   |
| Ouldeme           | 0,06            | 0,07              | 0,05              | 0,06     | 0,02     | 0,02     | 0,02   | 0,17     | 0,07          | 0,18  | 0,00       | 0,01        | 0,05    | 0,02  | 0,00  | 0,15    | 0,20  | 0,02   | 0,00 | 0,03   | 0,01 | 0,01 | 0,02   | 0,01  | 0,00 | 0,01    | 0,00    | 0,01    | 0,00   | 0,00            | 0,00         | 0,00  | 0,00  | 0,00          | 0,00            | 0,00    | 0,00  | 0,00    | 0,00   | 0,00   | 0,00    | 0,00   | 0,00     | 0,00    |      |   |
| Podokwo           | 0,10            | 0,10              | 0,06              | 0,08     | 0,04     | 0,04     | 0,04   | 0,20     | 0,11          | 0,21  | 0,02       | 0,01        | 0,07    | 0,04  | 0,03  | 0,16    | 0,20  | 0,03   | 0,02 | 0,03   | 0,04 | 0,02 | 0,03   | 0,04  | 0,02 | 0,03    | 0,04    | 0,00    | 0,04   | 0,01            | -            | -     | -     | -             | -               | -       | -     | -       | -      | -      | -       | -      | -        | -       |      |   |
| Tuareg            | 0,06            | 0,08              | 0,06              | 0,06     | 0,03     | 0,03     | 0,03   | 0,20     | 0,08          | 0,20  | 0,01       | 0,01        | 0,05    | 0,03  | 0,01  | 0,19    | 0,27  | 0,01   | 0,00 | 0,02   | 0,03 | 0,01 | 0,01   | 0,00  | 0,01 | 0,00    | 0,01    | 0,00    | 0,00   | 0,00            | 0,00         | 0,00  | 0,00  | 0,00          | 0,00            | 0,00    | 0,00  | 0,00    | 0,00   | 0,00   | 0,00    | 0,00   | 0,00     | 0,00    |      |   |
| Maroccan Berber   | 0,06            | 0,05              | 0,07              | 0,14     | 0,08     | 0,11     | 0,11   | 0,01     | 0,00          | 0,05  | 0,16       | 0,18        | 0,08    | 0,11  | 0,17  | 0,37    | 0,48  | 0,14   | 0,19 | 0,19   | 0,21 | 0,23 | 0,20   | 0,25  | 0,23 | 0,23    | 0,15    | 0,19    | 0,17   | 0,12            | 0,06         | 0,06  | 0,06  | 0,06          | 0,06            | 0,06    | 0,06  | 0,06    | 0,06   | 0,06   | 0,06    | 0,06   | 0,06     | 0,06    | 0,06 |   |
| Berber Souss      | 0,03            | 0,03              | 0,07              | 0,13     | 0,07     | 0,09     | 0,12   | 0,03     | 0,03          | 0,04  | 0,11       | 0,13        | 0,08    | 0,10  | 0,14  | 0,41    | 0,60  | 0,11   | 0,14 | 0,15   | 0,15 | 0,19 | 0,13   | 0,18  | 0,20 | 0,19    | 0,10    | 0,16    | 0,16   | 0,16            | 0,16         | 0,16  | 0,16  | 0,16          | 0,16            | 0,16    | 0,16  | 0,16    | 0,16   | 0,16   | 0,16    | 0,16   | 0,16     | 0,16    | 0,16 |   |
| Kesra             | 0,02            | 0,02              | 0,03              | 0,06     | 0,03     | 0,03     | 0,04   | 0,07     | 0,03          | 0,07  | 0,03       | 0,04        | 0,03    | 0,03  | 0,04  | 0,26    | 0,34  | 0,04   | 0,05 | 0,06   | 0,08 | 0,07 | 0,05   | 0,07  | 0,08 | 0,07    | 0,02    | 0,06    | 0,06   | 0,06            | 0,06         | 0,06  | 0,06  | 0,06          | 0,06            | 0,06    | 0,06  | 0,06    | 0,06   | 0,06   | 0,06    | 0,06   | 0,06     | 0,06    |      |   |
| Fali 2            | 0,10            | 0,11              | 0,07              | 0,10     | 0,04     | 0,04     | 0,04   | 0,24     | 0,13          | 0,26  | 0,03       | 0,02        | 0,07    | 0,03  | 0,01  | 0,14    | 0,17  | 0,03   | 0,00 | 0,02   | 0,03 | 0,00 | 0,04   | 0,03  | 0,00 | 0,02    | 0,00    | 0,02    | 0,00   | 0,02            | 0,02         | 0,02  | 0,02  | 0,02          | 0,02            | 0,02    | 0,02  | 0,02    | 0,02   | 0,02   | 0,02    | 0,02   | 0,02     | 0,02    |      |   |
| Fulani Bongor     | 0,15            | 0,16              | 0,16              | 0,16     | 0,08     | 0,09     | 0,09   | 0,33     | 0,19          | 0,34  | 0,10       | 0,11        | 0,13    | 0,09  | 0,03  | 0,23    | 0,33  | 0,11   | 0,07 | 0,14   | 0,12 | 0,09 | 0,12   | 0,05  | 0,06 | 0,05    | 0,05    | 0,09    | 0,07   | 0,31            | 0,22         | 0,13  | 0,13  | 0,13          | 0,13            | 0,13    | 0,13  | 0,13    | 0,13   | 0,13   | 0,13    | 0,13   | 0,13     | 0,13    |      |   |
| Fulani Tcheboua   | 0,12            | 0,13              | 0,12              | 0,14     | 0,05     | 0,06     | 0,05   | 0,29     | 0,16          | 0,30  | 0,06       | 0,05        | 0,09    | 0,06  | 0,01  | 0,22    | 0,30  | 0,07   | 0,03 | 0,09   | 0,05 | 0,04 | 0,06   | 0,03  | 0,02 | 0,02    | 0,02    | 0,05    | 0,04   | 0,27            | 0,18         | 0,10  | 0,10  | 0,10          | 0,10            | 0,10    | 0,10  | 0,10    | 0,10   | 0,10   | 0,10    | 0,10   | 0,10     | 0,10    |      |   |
| Fulani 1          | 0,08            | 0,10              | 0,08              | 0,10     | 0,04     | 0,04     | 0,04   | 0,20     | 0,10          | 0,20  | 0,03       | 0,03        | 0,07    | 0,04  | 0,01  | 0,22    | 0,31  | 0,04   | 0,02 | 0,06   | 0,05 | 0,03 | 0,04   | 0,00  | 0,01 | 0,02    | 0,00    | 0,03    | 0,01   | 0,19            | 0,12         | 0,05  | 0,05  | 0,05          | 0,05            | 0,05    | 0,05  | 0,05    | 0,05   | 0,05   | 0,05    | 0,05   | 0,05     | 0,05    |      |   |
| Fali 1            | 0,13            | 0,14              | 0,09              | 0,10     | 0,05     | 0,05     | 0,05   | 0,30     | 0,16          | 0,30  | 0,03       | 0,05        | 0,09    | 0,05  | 0,02  | 0,14    | 0,17  | 0,05   | 0,01 | 0,06   | 0,05 | 0,02 | 0,04   | 0,02  | 0,00 | 0,01    | 0,02    | 0,04    | 0,02   | 0,27            | 0,24         | 0,12  | 0,12  | 0,12          | 0,12            | 0,12    | 0,12  | 0,12    | 0,12   | 0,12   | 0,12    | 0,12   | 0,12     | 0,12    |      |   |
| Fulani 2          | 0,07            | 0,09              | 0,07              | 0,07     | 0,03     | 0,04     | 0,05   | 0,20     | 0,10          | 0,21  | 0,02       | 0,          |         |       |       |         |       |        |      |        |      |      |        |       |      |         |         |         |        |                 |              |       |       |               |                 |         |       |         |        |        |         |        |          |         |      |   |
